# Supplementary material
Source: PubMed Central journal article supplement (PMC3364928)
Supplement: supp_111.095430_biolreprod.111.095430-2.pdf [file supp_111.095430_biolreprod.111.095430-2.pdf]

Campos-Junior et al., Supplemental Figure S1.

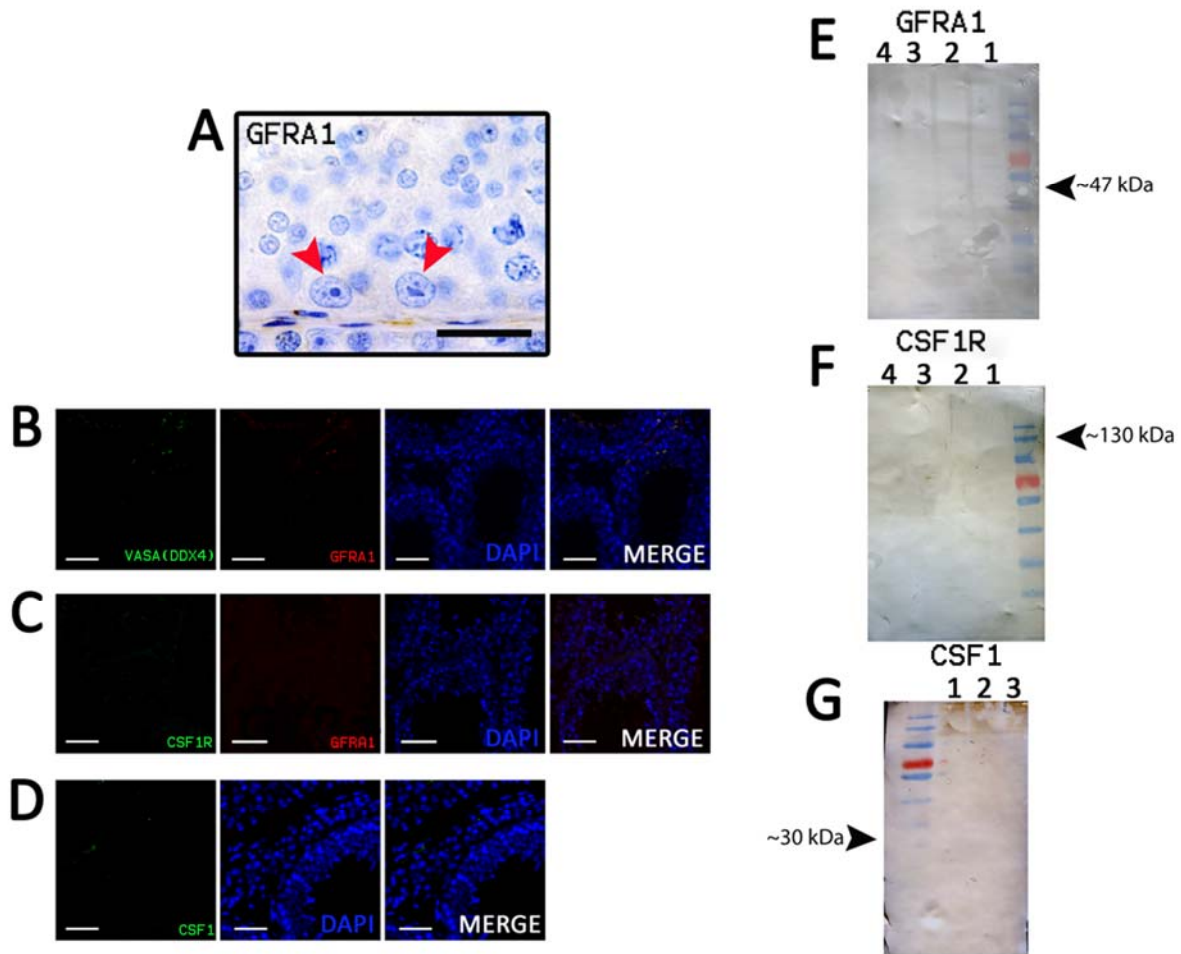

**Supplemental Figure S1.** Negative controls. (A) GFRA1 immunoperoxidase (bar = 80  $\mu$ m). (B) HSD3B (red) and DAPI (blue) immunofluorescence (bars = 100  $\mu$ m). (C) VASA (DDX4, green), GFRA1 (red) and DAPI (blue) immunofluorescence (bars = 50  $\mu$ m). (D) CSF1R (green), GFRA1 (red) and DAPI (blue) immunofluorescence (bars = 50  $\mu$ m). (E) CSF1 (green), and DAPI (blue) immunofluorescence (bars = 50  $\mu$ m). (F) GFRA1 negative immunoblotting, (G) CSF1R negative immunoblotting and (H) CSF1 negative immunoblotting.
